# Supplementary material
Source: PubMed Central journal article supplement (PMC9248025)
Supplement: NIHMS1758430-supplement-Supplemental_Figure_1.pdf [file NIHMS1758430-supplement-Supplemental_Figure_1.pdf]

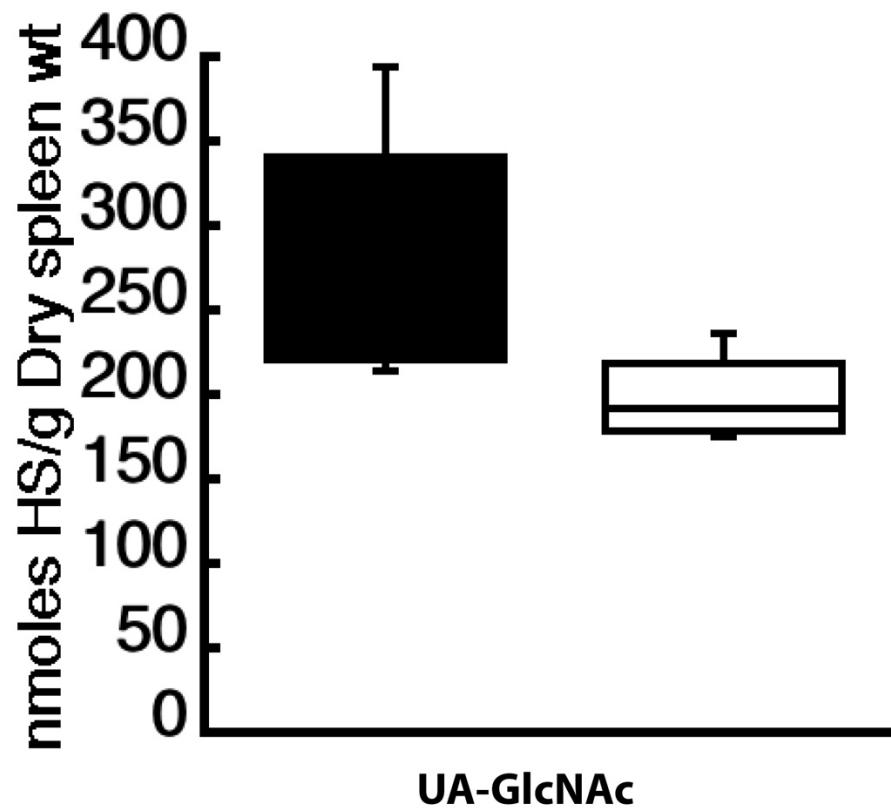

Supplemental Figure 1. Box graph shows the HS UA-GlcNAc disaccharide distribution in the spleens. Black bar are *Xylt2*<sup>+/+</sup> mice and white bar are *Xylt2*<sup>-/-</sup> mice, n=4 of each.
