# Supplementary material
Source: PubMed Central journal article supplement (PMC9248025)
Supplement: NIHMS1758430-supplement-Supplemental_Figure_2.pdf [file NIHMS1758430-supplement-Supplemental_Figure_2.pdf]

**33 #10 Kidney CS (0.3ug)**

|                  |                                                         |                   |          |
|------------------|---------------------------------------------------------|-------------------|----------|
| Sample Name:     | #10 Kidney CS (0.3ug)                                   | Injection Volume: | 50.0     |
| Vial Number:     | 7                                                       | Channel:          | Emission |
| Sample Type:     | unknown                                                 | Run Time (min):   | n.a.     |
| Control Program: | Con Dis UV FL 22 D rev                                  | Sequence:         | 080110   |
| Quantif. Method: | ConDiss                                                 |                   |          |
| Recording Time:  | 7/10/2010 4:02                                          |                   |          |
| Directory:       | GLYCO-DX600_1\Glycotechnology\2010\CS Analysis\Hinsdale |                   |          |

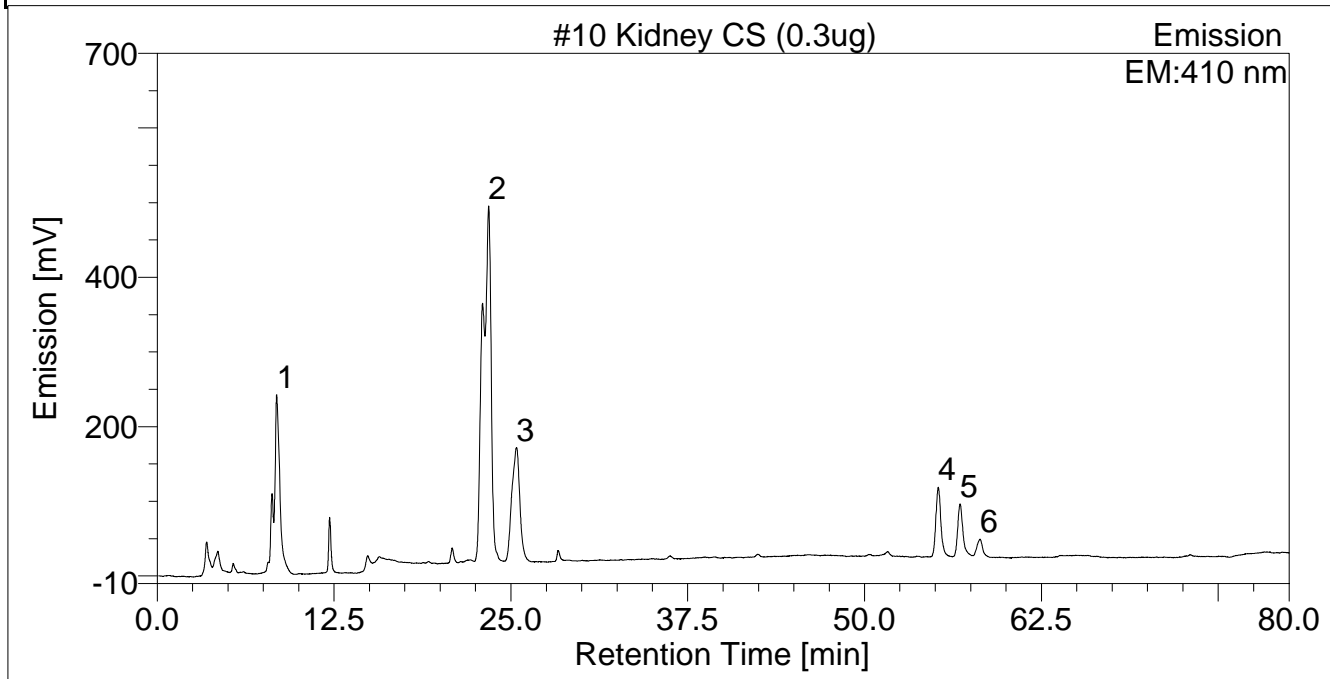

| No.           | Ret.Time<br>min | Peak Name               | Height<br>mV | Area<br>mV*min | Rel.Area<br>% | Amount<br>pMol |
|---------------|-----------------|-------------------------|--------------|----------------|---------------|----------------|
| 1             | 8.44            | UA-GalNAc (D0a0)        | 240.342      | 120.152        | 19.39         | 82.294         |
| 2             | 23.43           | UA-GalNAc-4S (D0a4)     | 474.247      | 324.940        | 52.43         | 235.581        |
| 3             | 25.39           | UA-GalNAc-6S (D0a6)     | 152.476      | 99.491         | 16.05         | 362.535        |
| 4             | 55.21           | UA-2A-GalNAc-4S (D2a4)  | 92.977       | 37.816         | 6.10          | 43.599         |
| 5             | 56.75           | UA-2A-GalNAc-6S (D2a6)  | 69.195       | 27.812         | 4.49          | 13.126         |
| 6             | 58.15           | UA-GalNAc-4S-6S (D0a10) | 22.343       | 9.512          | 1.53          | 15.960         |
| <b>Total:</b> |                 |                         | 1051.580     | 619.724        | 100.00        | 753.094        |
